# Supplementary material for: Preparation of polyoxometalates in ionic liquids by ionothermal synthesis
Source: Royal Society of Chemistry journal article supplement (doi:10.1039/b905079e), 2009-12-21
Supplement: b905079e.pdf [file b905079e.pdf]

## Supporting Information

### Preparation of Polyoxometalates in Ionic Liquids by Ionothermal Synthesis

Shiwei Lin,<sup>a,b</sup> Wenli Liu,<sup>a</sup> Yangguang Li,<sup>\*,a</sup> Qiong Wu,<sup>a</sup> Enbo Wang<sup>\*,a</sup> and Zhiming Zhang<sup>a</sup>

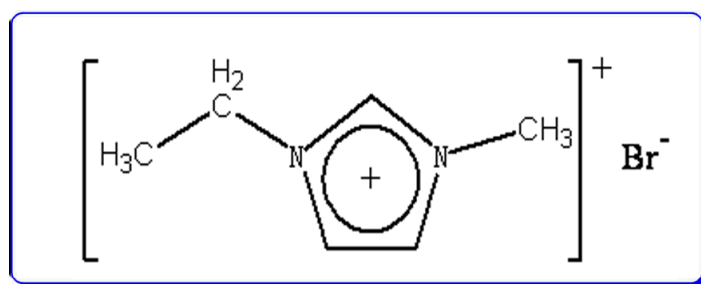

Scheme S1 Structure of the ILs [Emim]Br.

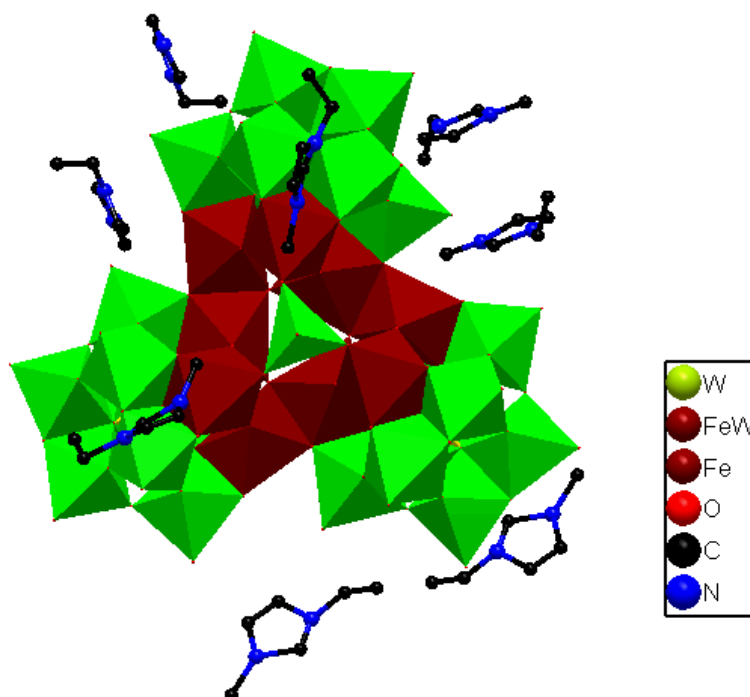

Fig. S1 Polyhedral and ball-and-stick representation of 1.

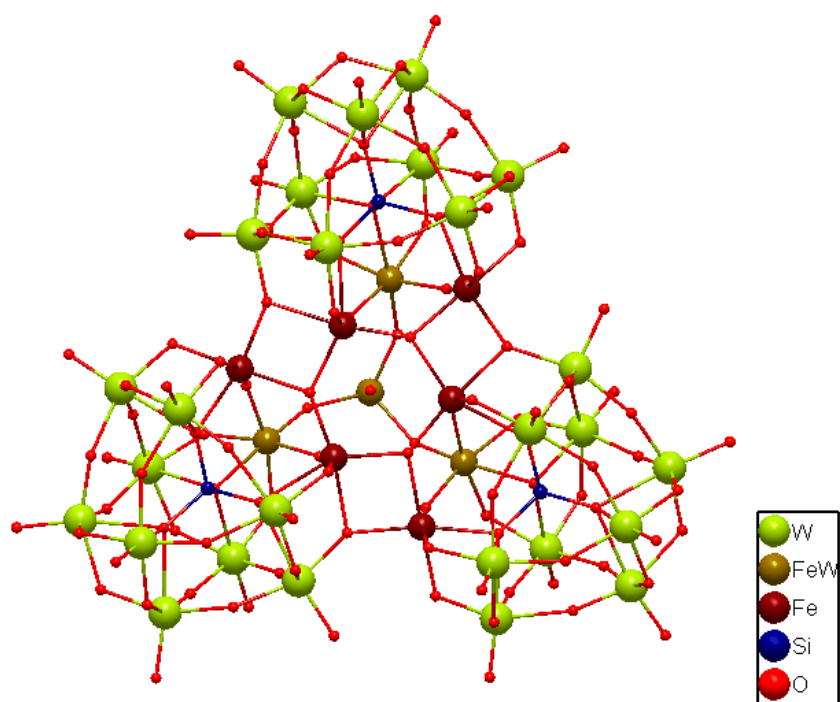

**Fig. S2** Ball-and-stick representation of **1a**.

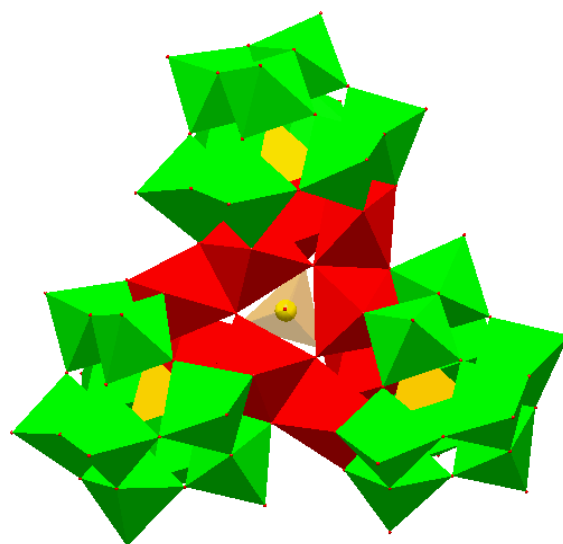

**Fig. S3** Polyhedral representations of **1a**.

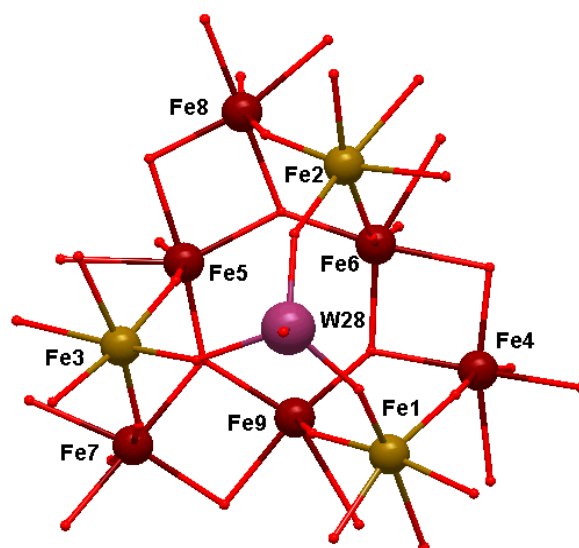

**Fig. S4** Ball-and-stick representations of the {WFe<sub>9</sub>} cluster in **1a**.

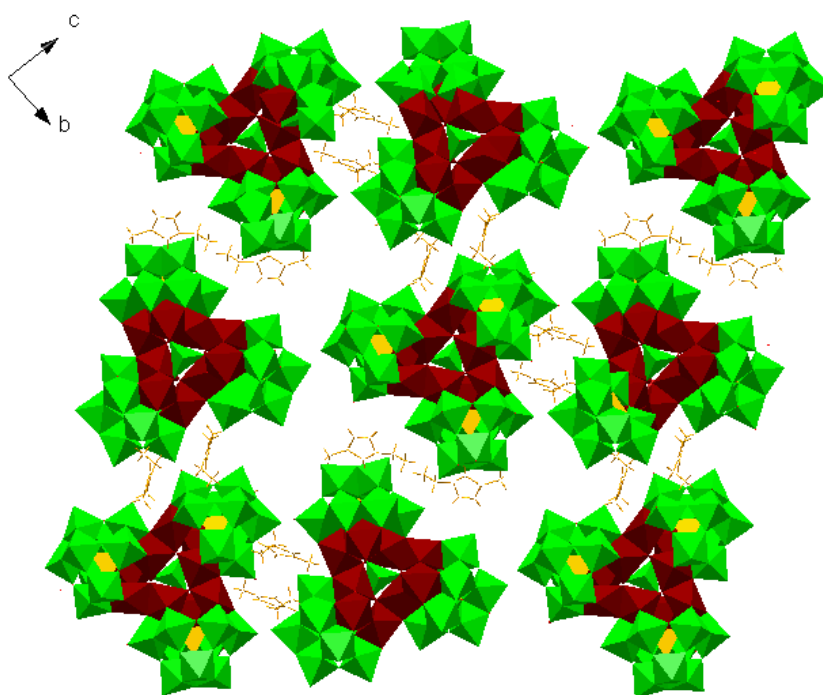

**Fig. S5** The packing arrangement of **1** viewed along a-axis, Na<sup>+</sup> and water molecules are omitted for clarity.

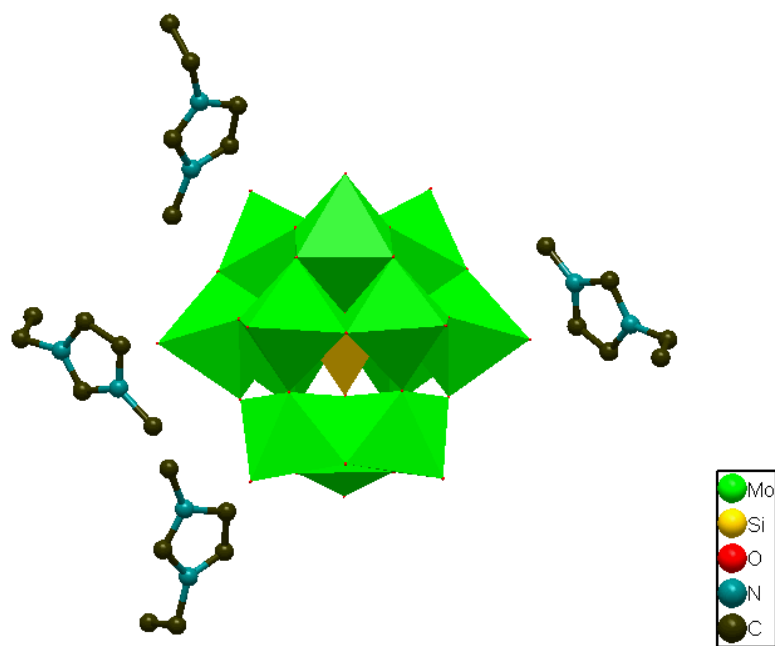

Fig. S6 Polyhedral and ball-and-stick representation of 2.

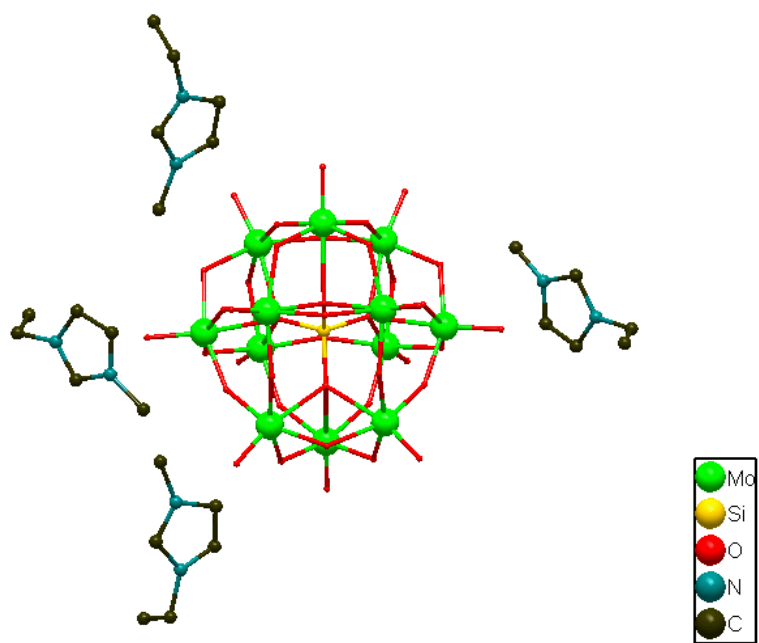

Fig. S7 Ball-and-stick representation of 2.

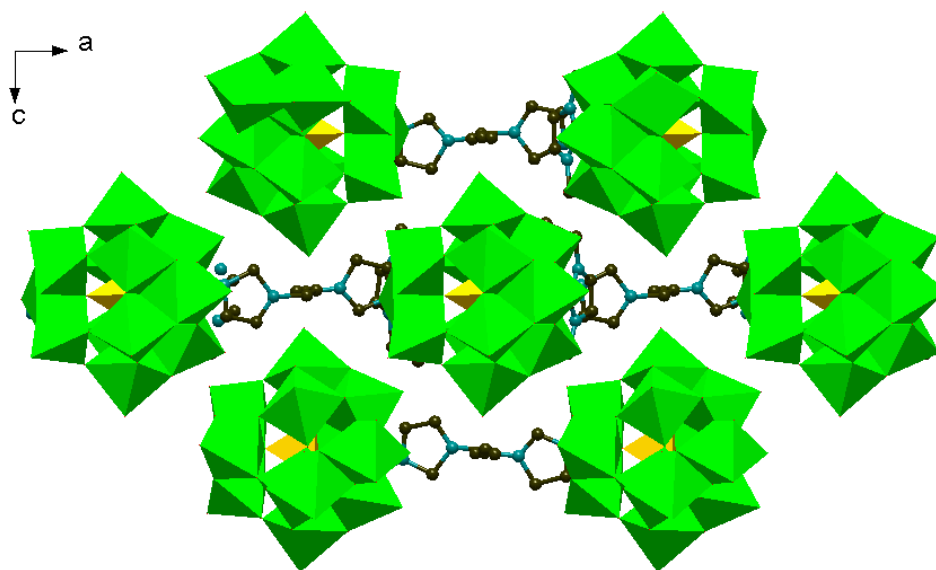

**Fig. S8** The packing arrangement of **2** viewed along b-axis, water molecules are omitted for clarity.

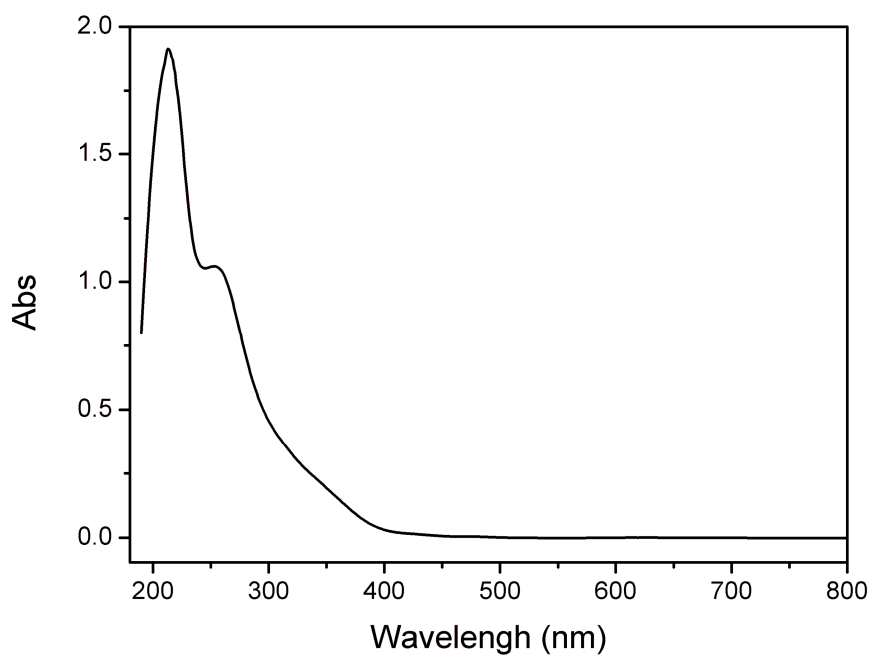

**Fig. S9** UV-vis spectrum of **1**.

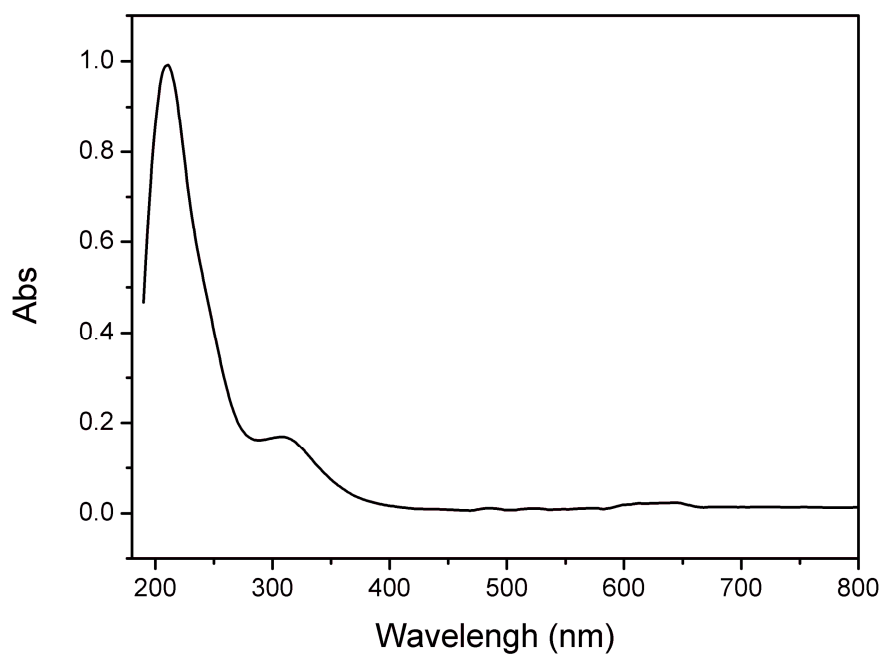

**Fig. S10** UV-vis spectrum of **2**.

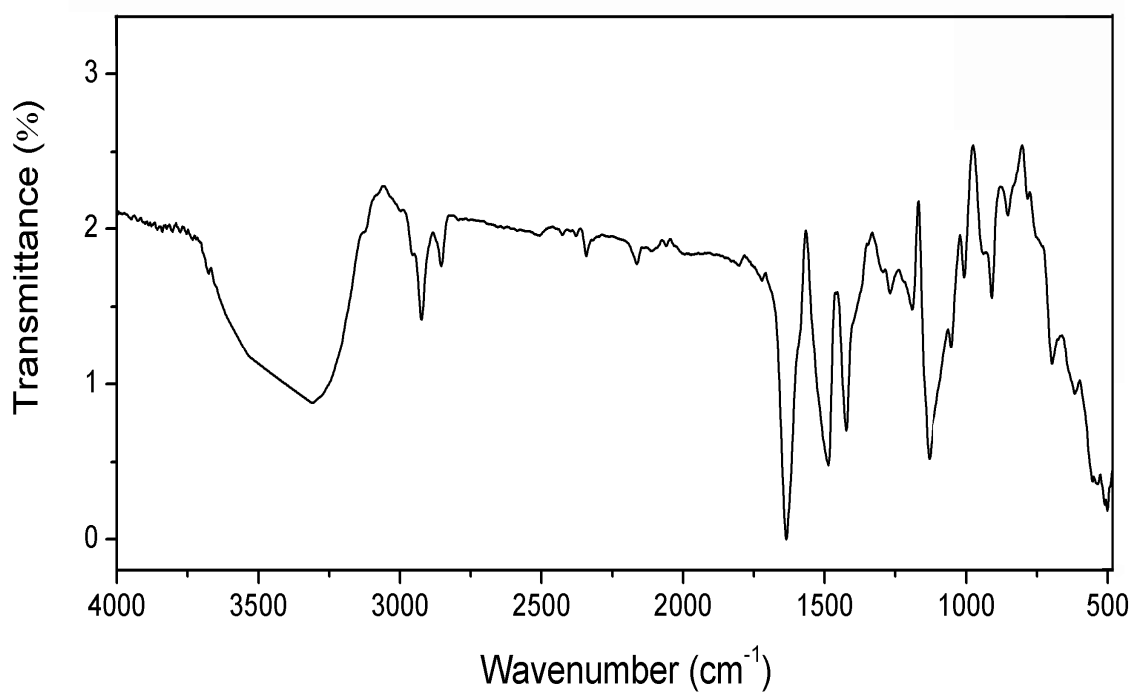

**Fig. S11** IR spectrum of **1**.

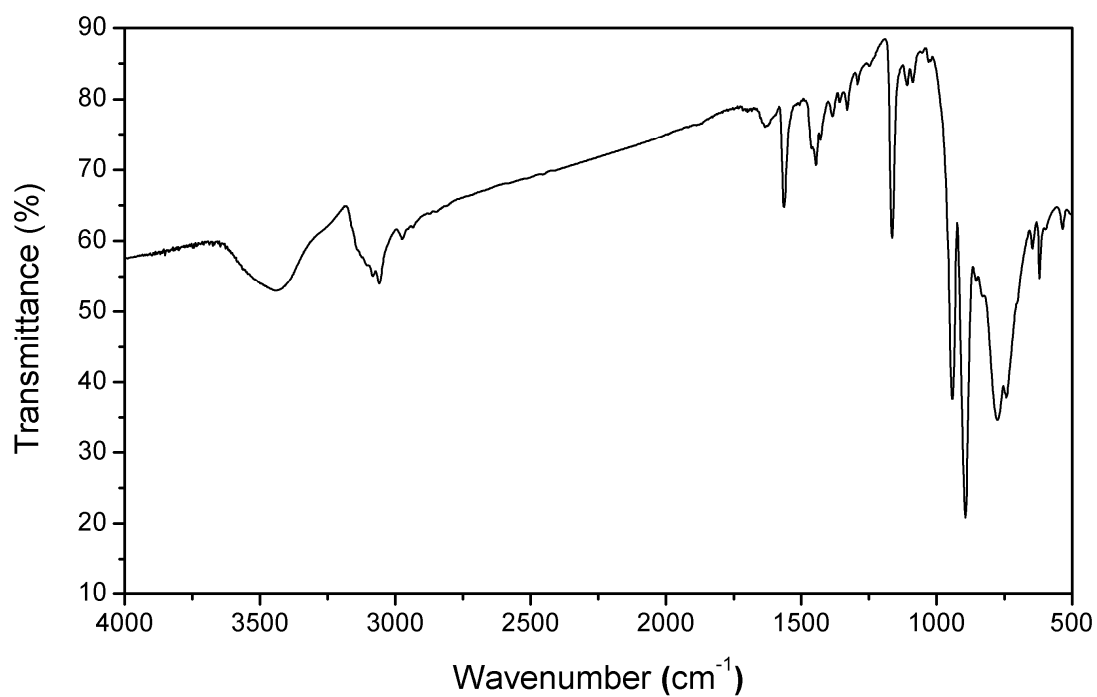

**Fig. S12** IR spectrum of **2**.

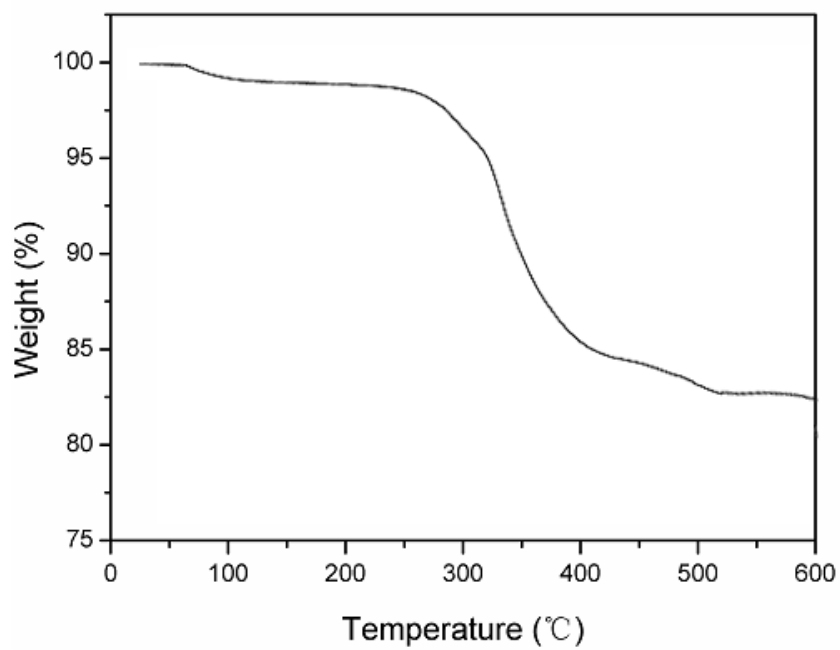

**Fig. S13** Thermogravimetric curve of **1**.

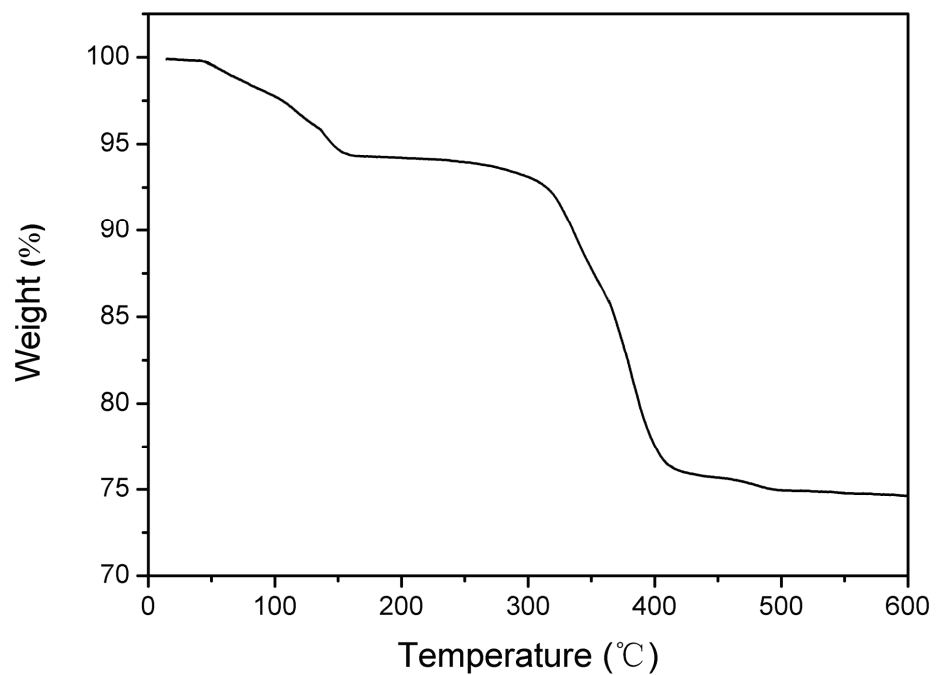

**Fig. S14** Thermogravimetric curve of **2**.



**Table S1** Crystal data and structure refinements for **1** and **2**.

|                                                                                                                                              | 1                                                                                                                                 | 2                                                                                |
|----------------------------------------------------------------------------------------------------------------------------------------------|-----------------------------------------------------------------------------------------------------------------------------------|----------------------------------------------------------------------------------|
| Empirical formula                                                                                                                            | C <sub>48</sub> H <sub>118</sub> W <sub>28</sub> Fe <sub>9</sub> Si <sub>3</sub> Na <sub>9</sub> N <sub>16</sub> O <sub>123</sub> | C <sub>24</sub> H <sub>72</sub> Mo <sub>12</sub> Si <sub>8</sub> O <sub>52</sub> |
| <i>M</i>                                                                                                                                     | 8791.92                                                                                                                           | 2484.22                                                                          |
| $\lambda/\text{\AA}$                                                                                                                         | 0.71073                                                                                                                           | 0.71073                                                                          |
| T/K                                                                                                                                          | 150(2)                                                                                                                            | 150(2)                                                                           |
| Crystal dimensions/mm                                                                                                                        | 0.23 × 0.21 × 0.19                                                                                                                | 0.16 × 0.13 × 0.12                                                               |
| Crystal system                                                                                                                               | Triclinic                                                                                                                         | Orthorhombic                                                                     |
| Space group                                                                                                                                  | P-1                                                                                                                               | P2(1)2(1)2(1)                                                                    |
| <i>a</i> /\AA                                                                                                                                | 15.302 (3)                                                                                                                        | 15.056(3)                                                                        |
| <i>b</i> /\AA                                                                                                                                | 23.309 (5)                                                                                                                        | 16.167(3)                                                                        |
| <i>c</i> /\AA                                                                                                                                | 27.828 (6)                                                                                                                        | 26.572(5)                                                                        |
| $\alpha/^\circ$                                                                                                                              | 86.24(3)                                                                                                                          | 90.00                                                                            |
| $\beta/^\circ$                                                                                                                               | 89.04(3)                                                                                                                          | 90.00                                                                            |
| $\gamma/^\circ$                                                                                                                              | 89.28(3)                                                                                                                          | 90.00                                                                            |
| <i>V</i> /\AA <sup>3</sup>                                                                                                                   | 9902 (3)                                                                                                                          | 6468(2)                                                                          |
| <i>Z</i>                                                                                                                                     | 2                                                                                                                                 | 4                                                                                |
| Dc/Mg m <sup>-3</sup>                                                                                                                        | 2.949                                                                                                                             | 2.547                                                                            |
| F(000)                                                                                                                                       | 7824                                                                                                                              | 4976                                                                             |
| $\theta$ Range/ $^\circ$                                                                                                                     | 3.20 ~ 25.00                                                                                                                      | 3.07 ~ 25.00                                                                     |
| Reflections collected / unique                                                                                                               | 61688 / 31581                                                                                                                     | 46487 / 11353                                                                    |
| R <sub>int</sub>                                                                                                                             | 0.1257                                                                                                                            | 0.0756                                                                           |
| Data/restraints/parameters                                                                                                                   | 31581 / 513 / 1601                                                                                                                | 11353 / 48 / 766                                                                 |
| R <sub>1</sub> ( <i>I</i> > 2 $\sigma$ ( <i>I</i> )) <sup>a</sup>                                                                            | 0.0857                                                                                                                            | 0.0593                                                                           |
| wR <sub>2</sub> (all data) <sup>b</sup>                                                                                                      | 0.213                                                                                                                             | 0.1591                                                                           |
| Goodness-of-fit on F <sup>2</sup>                                                                                                            | 0.936                                                                                                                             | 1.055                                                                            |
| $\Delta\rho_{\text{max, min}}/ \text{e \AA}^{-3}$                                                                                            | 4.618, -3.534                                                                                                                     | 1.666, -0.803                                                                    |
| CCDC No.                                                                                                                                     | 712657                                                                                                                            | 714994                                                                           |
| <sup>a</sup> R <sub>1</sub> = $\sum  F_0 - F_C  /\sum F_0 $ ; <sup>b</sup> wR <sub>2</sub> = $\sum[w(F_0^2-F_C^2)^2]/\sum[w(F_0^2)^2]^{1/2}$ |                                                                                                                                   |                                                                                  |

**Table S2** Selected bond lengths (Å) and angles (°) for W and Si centers in **1**.

|              |            |              |            |              |            |
|--------------|------------|--------------|------------|--------------|------------|
| W(1)-O(93)   | 1.6981(19) | W(2)-O(25)   | 1.6872(18) | W(3)-O(28)   | 1.6994(17) |
| W(1)-O(63)   | 1.84(2)    | W(2)-O(107)  | 1.8462(2)  | W(3)-O(35)   | 1.7842(19) |
| W(1)-O(71)   | 1.8638(18) | W(2)-O(83)   | 1.8602(2)  | W(3)-O(15)   | 1.8571(2)  |
| W(1)-O(115)  | 1.9290(18) | W(2)-O(68)   | 1.9832(2)  | W(3)-O(14)   | 1.8727(2)  |
| W(1)-O(86)   | 1.9752(2)  | W(2)-O(81)   | 2.0200(2)  | W(3)-O(32)   | 1.9435(2)  |
| W(1)-O(78)   | 2.3107(17) | W(2)-O(21)   | 2.4282(2)  | W(3)-O(18)   | 2.3841(16) |
| W(4)-O(45)   | 1.6578(18) | W(5)-O(13)   | 1.7474(2)  | W(6)-O(22)   | 1.7008(2)  |
| W(4)-O(114)  | 1.6947(18) | W(5)-O(81)   | 1.8068(2)  | W(6)-O(24)   | 1.8222(18) |
| W(4)-O(41)   | 1.8191(2)  | W(5)-O(12)   | 1.8793(19) | W(6)-O(80)   | 1.8380(2)  |
| W(4)-O(68)   | 1.8428(2)  | W(5)-O(32)   | 1.9325(19) | W(6)-O(4)    | 1.9258(2)  |
| W(4)-O(14)   | 2.0023(2)  | W(5)-O(19)   | 1.9517(2)  | W(6)-O(23)   | 2.0189(18) |
| W(4)-O(21)   | 2.3863(2)  | W(5)-O(18)   | 2.3381(16) | W(6)-O(66)   | 2.2695(2)  |
| W(7)-O(8)    | 1.7602(3)  | W(8)-O(70)   | 1.7648(18) | W(9)-O(51)   | 1.6710(0)  |
| W(7)-O(86)   | 1.8747(2)  | W(8)-O(77)   | 1.8455(16) | W(9)-O(50)   | 1.8515(2)  |
| W(7)-O(47)   | 1.8967(18) | W(8)-O(88)   | 1.9082(17) | W(9)-O(116)  | 1.9039(2)  |
| W(7)-O(76)   | 1.9356(2)  | W(8)-O(30)   | 1.9156(19) | W(9)-O(6)    | 1.9418(3)  |
| W(7)-O(40)   | 1.9728(2)  | W(8)-O(36)   | 2.0615(2)  | W(9)-O(106)  | 1.9525(3)  |
| W(7)-O(46)   | 2.3403(2)  | W(8)-O(97)   | 2.3784(17) | W(9)-O(108)  | 2.4031(17) |
| W(10)-O(39)  | 1.7156(16) | W(11)-O(100) | 1.6957(3)  | W(12)-O(69)  | 1.6246(2)  |
| W(10)-O(98)  | 1.7245(3)  | W(11)-O(36)  | 1.8117(2)  | W(12)-O(33)  | 1.7395(16) |
| W(10)-O(90)  | 1.8253(19) | W(11)-O(99)  | 1.8605(2)  | W(12)-O(5)   | 1.8393(19) |
| W(10)-O(94)  | 1.9579(17) | W(11)-O(35)  | 2.0520(18) | W(12)-O(106) | 1.8917(2)  |
| W(10)-O(116) | 2.0461(2)  | W(11)-O(114) | 2.1202(18) | W(12)-O(10)  | 2.0679(2)  |
| W(10)-O(79)  | 2.4004(2)  | W(11)-O(97)  | 2.3776(18) | W(12)-O(108) | 2.4057(18) |
| W(13)-O(31)  | 1.7802(2)  | W(14)-O(2)   | 1.7701(2)  | W(15)-O(105) | 1.6553(3)  |
| W(13)-O(19)  | 1.8674(19) | W(14)-O(54)  | 1.8472(2)  | W(15)-O(23)  | 1.8132(19) |
| W(13)-O(9)   | 1.8932(18) | W(14)-O(49)  | 1.8886(19) | W(15)-O(40)  | 1.9195(2)  |
| W(13)-O(88)  | 1.9416(19) | W(14)-O(30)  | 1.9152(19) | W(15)-O(42)  | 1.9552(2)  |
| W(13)-O(15)  | 1.9945(18) | W(14)-O(9)   | 1.9336(19) | W(15)-O(101) | 1.9584(2)  |
| W(13)-O(18)  | 2.3292(17) | W(14)-O(103) | 2.3621(19) | W(15)-O(46)  | 2.3634(2)  |
| W(16)-O(34)  | 1.7775(2)  | W(17)-O(16)  | 1.6922(3)  | W(18)-(67)   | 1.7128(2)  |
| W(16)-O(57)  | 1.9210(2)  | W(17)-O(104) | 1.8655(18) | W(18)-(20)   | 1.7550(2)  |
| W(16)-O(58)  | 1.9223(3)  | W(17)-O(49)  | 1.9352(18) | W(18)-O(101) | 1.8704(2)  |
| W(16)-O(82)  | 1.9311(18) | W(17)-O(83)  | 1.9628(2)  | W(18)-O(55)  | 1.9552(2)  |
| W(16)-O(39)  | 2.2392(15) | W(17)-O(12)  | 1.9843(19) | W(18)-O(80)  | 1.9890(2)  |
| W(16)-O(79)  | 2.2943(2)  | W(17)-O(103) | 2.4087(2)  | W(18)-O(89)  | 2.4152(2)  |
| Si(1)-O(97)  | 1.5873(2)  | Si(2)-O(109) | 1.5807(2)  | Si(3)-O(89)  | 1.5320(2)  |
| Si(1)-O(103) | 1.5947(2)  | Si(2)-O(79)  | 1.6519(2)  | Si(3)-O(46)  | 1.6505(2)  |
| Si(1)-O(21)  | 1.6180(2)  | Si(2)-O(108) | 1.6630(19) | Si(3)-O(78)  | 1.6734(18) |

|                    |            |                     |            |                    |            |
|--------------------|------------|---------------------|------------|--------------------|------------|
| Si(1)-O(18)        | 1.6343(17) | Si(2)-O(37)         | 1.6924(17) | Si(3)-O(66)        | 1.7663(3)  |
| O(93)-W(1)-O(63)   | 90.5(9)    | O(25)-W(2)-O(107)   | 104.86(9)  | O(28)-W(3)-O(35)   | 103.34(10) |
| O(93)-W(1)-O(71)   | 103.1(9)   | O(25)-W(2)-O(83)    | 102.47(9)  | O(28)-W(3)-O(15)   | 97.49(910) |
| O(63)-W(1)-O(71)   | 103.4(9)   | O(25)-W(2)-O(68)    | 100.65(8)  | O(28)-W(3)-O(14)   | 102.94(10) |
| O(93)-W(1)-O(115)  | 103.4(9)   | O(25)-W(2)-O(81)    | 100.59(9)  | O(28)-W(3)-O(32)   | 98.14(9)   |
| O(63)-W(1)-O(115)  | 158.9(8)   | O(25)-W(2)-O(21)    | 172.41(9)  | O(28)-W(3)-O(18)   | 167.98(10) |
| O(45)-W(4)-O(114)  | 102.03(10) | O(13)-W(5)-O(81)    | 107.3(11)  | O(22)-W(6)-O(24)   | 105.01(9)  |
| O(45)-W(4)-O(41)   | 101.54(10) | O(81)-W(5)-O(12)    | 102.6(10)  | O(22)-W(6)-O(80)   | 102.37(9)  |
| O(114)-W(4)-O(41)  | 91.8(8)    | O(13)-W(5)-O(32)    | 89.3(9)    | O(24)-W(6)-O(80)   | 91.3(9)    |
| O(114)-W(4)-O(68)  | 156.6(10)  | O(13)-W(5)-O(32)    | 98.7(10)   | O(22)-W(6)-O(4)    | 98.76( )   |
| O(41)-W(4)-O(68)   | 91.5(9)    | O(81)-W(5)-O(32)    | 87.1(9)    | O(22)-W(6)-O(66)   | 100.5(11)  |
| O(8)-W(7)-O(86)    | 102.12(10) | O(70)-W(8)-O(77)    | 101.84(8)  | O(51)-W(9)-O(50)   | 99.65(10)  |
| O(8)-W(7)-O(47)    | 102.18(11) | O(70)-W(8)-O(88)    | 100.57(8)  | O(51)-W(9)-O(116)  | 101.63(10) |
| O(86)-W(7)-O(76)   | 90.1(9)    | O(77)-W(8)-O(88)    | 157.4(7)   | O(50)-W(9)-O(116)  | 81.5(9)    |
| O(47)-W(7)-O(76)   | 158.0(8)   | O(70)-W(8)-O(30)    | 102.9(9)   | O(51)-W(9)-O(6)    | 102.5(10)  |
| O(86)-W(7)-O(40)   | 158.5(9)   | O(88)-W(8)-O(30)    | 87.0(8)    | O(116)-W(9)-O(6)   | 89.5(8)    |
| O(39)-W(10)-O(98)  | 90.91(10)  | O(100)-W(11)-O(36)  | 98.26(11)  | O(69)-W(12)-O(33)  | 103.76(9)  |
| O(39)-W(10)-O(90)  | 96.93(8)   | O(100)-W(11)-O(99)  | 99.24(11)  | O(69)-W(12)-O(5)   | 102.79(10) |
| O(98)-W(10)-O(90)  | 104.6(10)  | O(99)-W(11)-O(35)   | 159.6(9)   | O(69)-W(12)-O(5)   | 102.8(10)  |
| O(39)-W(10)-O(94)  | 81.0(7)    | O(100)-W(11)-O(114) | 102.4(9)   | O(33)-W(12)-O(5)   | 94.5(8)    |
| O(90)-W(10)-O(94)  | 157.3(8)   | O(36)-W(11)-O(114)  | 154.8(9)   | O(69)-W(12)-O(106) | 98.0(11)   |
| O(97)-Si(1)-O(103) | 10769(10)  | O(109)-Si(2)-O(79)  | 111.04(12) | O(89)-Si(3)-O(46)  | 107.95(12) |
| O(97)-Si(1)-O(21)  | 105.54(12) | O(109)-Si(2)-O(108) | 113.28(11) | O(89)-Si(3)-O(78)  | 109.34(12) |
| O(97)-Si(1)-O(18)  | 111.80(10) | O(109)-Si(2)-O(37)  | 110.70(10) | O(89)-Si(3)-O(66)  | 111.24(11) |
| O(103)-Si(1)-O(21) | 110.68(12) | O(79)-Si(2)-O(108)  | 108.31(9)  | O(46)-Si(3)-O(78)  | 109.24(12) |

**Table S3** Selected bond lengths (Å) and angles (°) for Fe centers in **1**.

|              |            |              |            |              |            |
|--------------|------------|--------------|------------|--------------|------------|
| Fe(1)-O(60)  | 1.8488(2)  | Fe(2)-O(3)   | 1.8644(2)  | Fe(3)-O(27)  | 1.9166(3)  |
| Fe(1)-O(85)  | 1.8570(2)  | Fe(2)-O(91)  | 1.9437(3)  | Fe(3)-O(96)  | 1.9337(19) |
| Fe(1)-O(48)  | 1.8987(2)  | Fe(2)-O(64)  | 1.9743(19) | Fe(3)-O(7)   | 1.9550(18) |
| Fe(1)-O(104) | 1.9917(2)  | Fe(2)-O(20)  | 2.0390(2)  | Fe(3)-O(26)  | 2.0209(19) |
| Fe(1)-O(54)  | 1.9921(2)  | Fe(2)-O(17)  | 2.0600(2)  | Fe(3)-O(11)  | 2.1071(2)  |
| Fe(1)-O(103) | 2.2631(18) | Fe(2)-O(89)  | 2.3471(2)  | Fe(3)-O(37)  | 2.1903(16) |
| Fe(4)-O(113) | 1.9412(17) | Fe(5)-O(59)  | 1.8687(3)  | Fe(6)-O(102) | 1.8464(2)  |
| Fe(4)-O(41)  | 1.9752(19) | Fe(5)-O(26)  | 1.9021(2)  | Fe(6)-O(64)  | 1.9544(2)  |
| Fe(4)-O(107) | 2.0013(2)  | Fe(5)-O(90)  | 1.9757(2)  | Fe(6)-O(71)  | 1.9928(18) |
| Fe(4)-O(84)  | 2.0910(17) | Fe(5)-O(102) | 2.0163(2)  | Fe(6)-O(84)  | 2.0161(18) |
| Fe(4)-O(85)  | 2.0913(2)  | Fe(5)-O(82)  | 2.0736(18) | Fe(6)-O(113) | 2.1409(15) |
| Fe(4)-O(21)  | 2.1167(2)  | Fe(5)-O(79)  | 2.2601(19) | Fe(6)-O(78)  | 2.2907(18) |
| Fe(7)-O(7)   | 1.9368(19) | Fe(8)-O(82)  | 1.9026(2)  | Fe(9)-O(84)  | 1.873(17)  |

|                     |            |                    |            |                     |            |
|---------------------|------------|--------------------|------------|---------------------|------------|
| Fe(7)-O(33)         | 1.9810(19) | Fe(8)-O(24)        | 1.9760(18) | Fe(9)-O(59)         | 1.99(3)    |
| Fe(7)-O(50)         | 1.9825(2)  | Fe(8)-O(38)        | 1.9916(19) | Fe(9)-O(48)         | 2.03(2)    |
| Fe(7)-O(77)         | 2.0028(17) | Fe(8)-O(3)         | 2.0073(2)  | Fe(9)-O(99)         | 2.06(2)    |
| Fe(7)-O(59)         | 2.0672(3)  | Fe(8)-O(102)       | 2.0476(19) | Fe(9)-O(99)         | 2.06(2)    |
| Fe(7)-O(108)        | 2.0716(18) | Fe(8)-O(66)        | 2.0677(2)  | Fe(9)-O(99)         | 2.06(2)    |
| O(60)-Fe(1)-O(85)   | 97.60(10)  | O(3)-Fe(2)-O(91)   | 99.38(10)  | O(27)-Fe(3)-O(96)   | 91.62(9)   |
| O(60)-Fe(1)-O(48)   | 94.68(10)  | O(3)-Fe(2)-O(64)   | 91.55(9)   | O(27)-Fe(3)-O(7)    | 101.54(8)  |
| O(60)-Fe(1)-O(104)  | 96.89(10)  | O(3)-Fe(2)-O(20)   | 88.72(9)   | O(27)-Fe(3)-O(26)   | 98.30(9)   |
| O(60)-Fe(1)-O(54)   | 96.54(10)  | O(3)-Fe(2)-O(17)   | 164.27(10) | O(27)-Fe(3)-O(11)   | 92.40(8)   |
| O(60)-Fe(1)-O(103)  | 171.03(10) | O(3)-Fe(2)-O(89)   | 89.52(9)   | O(27)-Fe(3)-O(37)   | 163.87(7)  |
| O(113)-Fe(4)-O(41)  | 93.75(8)   | O(59)-Fe(5)-O(26)  | 89.97(11)  | O(102)-Fe(6)-O(64)  | 90.64(9)   |
| O(113)-Fe(4)-O(107) | 90.98(8)   | O(59)-Fe(5)-O(90)  | 94.19(11)  | O(102)-Fe(6)-O(71)  | 93.96(8)   |
| O(113)-Fe(4)-O(84)  | 87.29(7)   | O(59)-Fe(5)-O(102) | 106.18(10) | O(102)-Fe(6)-O(84)  | 105.89(8)  |
| O(113)-Fe(4)-O(85)  | 96.52(8)   | O(59)-Fe(5)-O(82)  | 172.68(10) | O(102)-Fe(6)-O(113) | 171.77(8)  |
| O(113)-Fe(4)-O(21)  | 166.55(7)  | O(59)-Fe(5)-O(79)  | 102.04(10) | O(102)-Fe(6)-O(78)  | 101.45(8)  |
| O(7)-Fe(7)-O(33)    | 88.54(7)   | O(82)-Fe(8)-O(24)  | 95.11(7)   | O(84)-Fe(9)-O(59)   | 106.05(10) |
| O(7)-Fe(7)-O(50)    | 171.53(8)  | O(82)-Fe(8)-O(38)  | 98.22(8)   | O(84)-Fe(9)-O(48)   | 90.80(9)   |
| O(7)-Fe(7)-O(77)    | 95.27(8)   | O(82)-Fe(8)-O(3)   | 95.13(9)   | O(84)-Fe(9)-O(99)   | 92.82(8)   |
| O(7)-Fe(7)-O(59)    | 87.44(9)   | O(82)-Fe(8)-O(102) | 84.26(8)   | O(84)-Fe(9)-O(77)   | 169.71(8)  |
| O(7)-Fe(7)-O(108)   | 91.66(9)   | O(82)-Fe(8)-O(66)  | 166.15(9)  | O(84)-Fe(9)-O(97)   | 100.23(7)  |

**Table S4** Selected bond lengths (Å) and angles (°) for Mo and Si centers in **2**.

|             |          |             |          |             |          |
|-------------|----------|-------------|----------|-------------|----------|
| Mo(1)-O(23) | 1.677(8) | Mo(2)-O(20) | 1.666(8) | Mo(3)-O(6)  | 1.668(6) |
| Mo(1)-O(17) | 1.853(7) | Mo(2)-O(5)  | 1.873(7) | Mo(3)-O(29) | 1.871(6) |
| Mo(1)-O(28) | 1.907(8) | Mo(2)-O(11) | 1.910(6) | Mo(3)-O(11) | 1.902(7) |
| Mo(1)-O(16) | 1.933(8) | Mo(2)-O(24) | 1.922(7) | Mo(3)-O(39) | 1.924(7) |
| Mo(1)-O(7)  | 1.939(7) | Mo(2)-O(19) | 1.924(7) | Mo(3)-O(36) | 1.954(7) |
| Mo(1)-O(13) | 2.378(6) | Mo(2)-O(2)  | 2.323(6) | Mo(3)-O(4)  | 2.331(6) |
| Mo(4)-O(3)  | 1.678(7) | Mo(5)-O(9)  | 1.675(6) | Mo(6)-O(33) | 1.672(8) |
| Mo(4)-O(26) | 1.886(8) | Mo(5)-O(30) | 1.884(7) | Mo(6)-O(34) | 1.867(7) |
| Mo(4)-O(31) | 1.903(7) | Mo(5)-O(24) | 1.918(8) | Mo(6)-O(32) | 1.885(7) |
| Mo(4)-O(38) | 1.931(7) | Mo(5)-O(21) | 1.924(7) | Mo(6)-O(27) | 1.915(7) |
| Mo(4)-O(36) | 1.932(7) | Mo(5)-O(17) | 1.945(6) | Mo(6)-O(35) | 1.956(8) |
| Mo(4)-O(4)  | 2.355(6) | Mo(5)-O(2)  | 2.374(5) | Mo(6)-O(14) | 2.370(7) |
| Mo(7)-O(8)  | 1.681(7) | Mo(8)-O(37) | 1.681(6) | Mo(9)-O(22) | 1.657(7) |
| Mo(7)-O(1)  | 1.878(7) | Mo(8)-O(27) | 1.867(7) | Mo(9)-O(5)  | 1.910(8) |
| Mo(7)-O(31) | 1.911(7) | Mo(8)-O(15) | 1.879(7) | Mo(9)-O(35) | 1.932(8) |
| Mo(7)-O(7)  | 1.922(7) | Mo(8)-O(38) | 1.947(7) | Mo(9)-O(29) | 1.941(6) |
| Mo(7)-O(18) | 1.929(8) | Mo(8)-O(39) | 1.957(8) | Mo(9)-O(25) | 1.948(8) |
| Mo(7)-O(13) | 2.354(6) | Mo(8)-O(4)  | 2.349(6) | Mo(9)-O(14) | 2.310(7) |

|                    |          |                    |          |                    |          |
|--------------------|----------|--------------------|----------|--------------------|----------|
| Mo(10)-O(12)       | 1.682(7) | Mo(11)-O(40)       | 1.688(8) | Mo(12)-O(10)       | 1.675(6) |
| Mo(10)-O(1)        | 1.920(7) | Mo(11)-O(15)       | 1.924(7) | Mo(12)-O(28)       | 1.897(8) |
| Mo(10)-O(26)       | 1.934(7) | Mo(11)-O(16)       | 1.925(7) | Mo(12)-O(30)       | 1.899(7) |
| Mo(10)-O(21)       | 1.936(7) | Mo(11)-O(34)       | 1.928(7) | Mo(12)-O(25)       | 1.927(8) |
| Mo(10)-O(19)       | 1.944(7) | Mo(11)-O(18)       | 1.946(7) | Mo(12)-O(32)       | 1.965(7) |
| Mo(10)-O(2)        | 2.355(6) | Mo(11)-O(13)       | 2.387(6) | Mo(12)-O(14)       | 2.356(6) |
| Si(1)-O(13)        | 1.585(7) | O(13)-Si(1)-O(2)   | 111.0(3) | O(13)-Si(1)-O(14)  | 111.4(3) |
| Si(1)-O(2)         | 1.624(6) | O(13)-Si(1)-O(4)   | 110.4(3) | O(2)-Si(1)-O(14)   | 107.6(4) |
| Si(1)-O(4)         | 1.630(6) | O(2)-Si(1)-O(4)    | 107.9(3) | O(4)-Si(1)-O(14)   | 108.5(3) |
| Si(1)-O(14)        | 1.631(6) | O(20)-Mo(2)-O(11)  | 101.7(4) | O(6)-Mo(3)-O(29)   | 102.2(4) |
| O(28)-Mo(1)-O(16)  | 86.5(3)  | O(24)-Mo(2)-O(2)   | 73.7(3)  | O(39)-Mo(3)-O(4)   | 73.5(3)  |
| O(28)-Mo(1)-O(7)   | 157.8(3) | O(20)-Mo(2)-O(2)   | 169.5(4) | O(29)-Mo(3)-O(11)  | 86.8(3)  |
| O(16)-Mo(1)-O(13)  | 72.6(3)  | O(5)-Mo(2)-O(2)    | 87.2(3)  | O(6)-Mo(3)-O(4)    | 167.9(3) |
| O(23)-Mo(1)-O(16)  | 100.6(4) | O(20)-Mo(2)-O(5)   | 100.2(4) | O(29)-Mo(3)-O(4)   | 87.4(3)  |
| O(23)-Mo(1)-O(13)  | 170.0(3) | O(11)-Mo(2)-O(2)   | 86.1(3)  | O(11)-Mo(3)-O(39)  | 160.2(3) |
| O(26)-Mo(4)-O(31)  | 87.4(3)  | O(24)-Mo(5)-O(21)  | 88.3(3)  | O(34)-Mo(6)-O(27)  | 86.6(3)  |
| O(3)-Mo(4)-O(38)   | 97.8(4)  | O(9)-Mo(5)-O(17)   | 101.2(3) | O(32)-Mo(6)-O(27)  | 158.6(3) |
| O(36)-Mo(4)-O(4)   | 73.6(2)  | O(24)-Mo(5)-O(2)   | 72.6(3)  | O(33)-Mo(6)-O(35)  | 97.2(4)  |
| O(38)-Mo(4)-O(36)  | 87.6(3)  | O(24)-Mo(5)-O(17)  | 158.3(3) | O(33)-Mo(6)-O(14)  | 166.9(3) |
| O(3)-Mo(4)-O(4)    | 167.7(3) | O(9)-Mo(5)-O(2)    | 170.0(3) | O(35)-Mo(6)-O(14)  | 72.5(3)  |
| O(31)-Mo(7)-O(7)   | 159.4(3) | O(27)-Mo(8)-O(39)  | 90.1(3)  | O(22)-Mo(9)-O(14)  | 168.1(4) |
| O(8)-Mo(7)-O(18)   | 99.4(3)  | O(15)-Mo(8)-O(4)   | 87.9(3)  | O(5)-Mo(9)-O(35)   | 160.7(3) |
| O(1)-Mo(7)-O(18)   | 158.9(3) | O(38)-Mo(8)-O(4)   | 73.6(2)  | O(22)-Mo(9)-O(29)  | 101.7(4) |
| O(8)-Mo(7)-O(13)   | 169.3(3) | O(39)-Mo(8)-O(4)   | 72.6(3)  | O(29)-Mo(9)-O(14)  | 87.5(3)  |
| O(18)-Mo(7)-O(13)  | 73.4(3)  | O(27)-Mo(8)-O(4)   | 86.2(3)  | O(25)-Mo(9)-O(14)  | 73.5(3)  |
| O(26)-Mo(10)-O(21) | 159.0(3) | O(16)-Mo(11)-O(13) | 72.6(3)  | O(10)-Mo(12)-O(28) | 102.2(3) |
| O(1)-Mo(10)-O(19)  | 158.9(3) | O(34)-Mo(11)-O(13) | 84.7(3)  | O(10)-Mo(12)-O(30) | 105.4(4) |
| O(12)-Mo(10)-O(2)  | 168.4(4) | O(18)-Mo(11)-O(13) | 72.3(3)  | O(28)-Mo(12)-O(30) | 89.0(3)  |
| O(21)-Mo(10)-O(2)  | 73.9(3)  | O(15)-Mo(11)-O(16) | 157.9(3) | O(10)-Mo(12)-O(14) | 166.9(3) |
| O(19)-Mo(10)-O(2)  | 72.8(3)  | O(40)-Mo(11)-O(13) | 170.3(4) | O(32)-Mo(12)-O(14) | 72.3(3)  |
